# Supplementary material for: SNRPB-mediated RNA splicing drives tumor cell proliferation and stemness in hepatocellular carcinoma
Source: publisher site journal article supplement (doi:10.18632/aging.202164), 2020-12-03
Supplement: Supplementary file [file aging-v13i1-202164-supplementary-material-SD1.pdf]

SUPPLEMENTARY FIGURES

**A** Univariate Cox proportional hazard regression analyses for overall survival

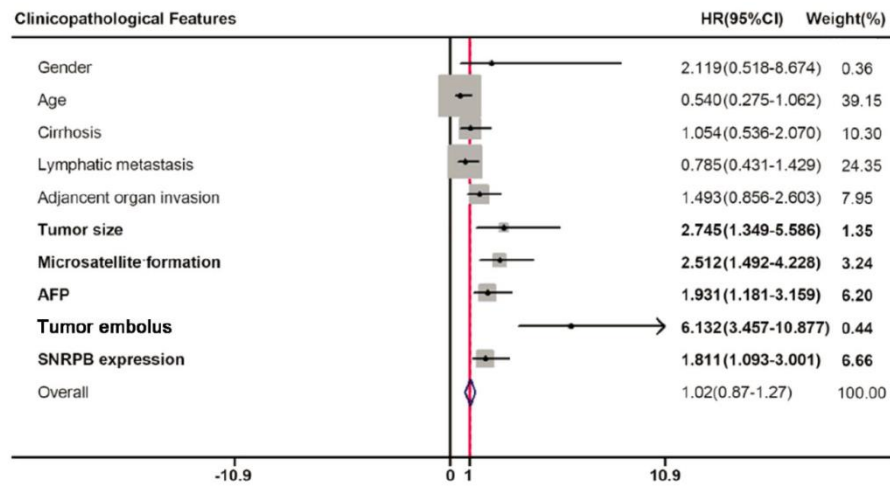

**B** Multivariate Cox proportional hazard regression analyses for overall survival

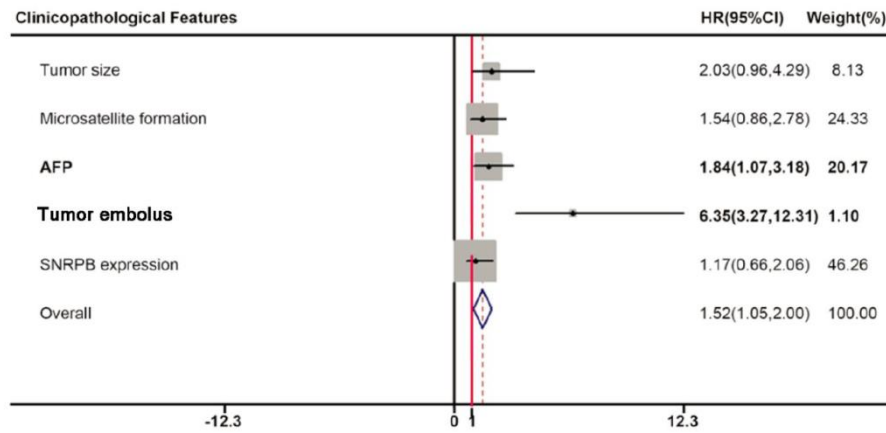

**Supplementary Figure 1. SNRPB was associated with the poor survival of HCC patients. (A)** Forrest plot of the univariate analysis shows that the hazard ratio (HR) of tumor size, microsatellite formation, AFP, tumor embolus, SNRPB expression are significantly greater than 1. **(B)** Forrest plot of the multivariate analysis shows that the hazard ratio (HR) of tumor embolus are significantly greater than 1.

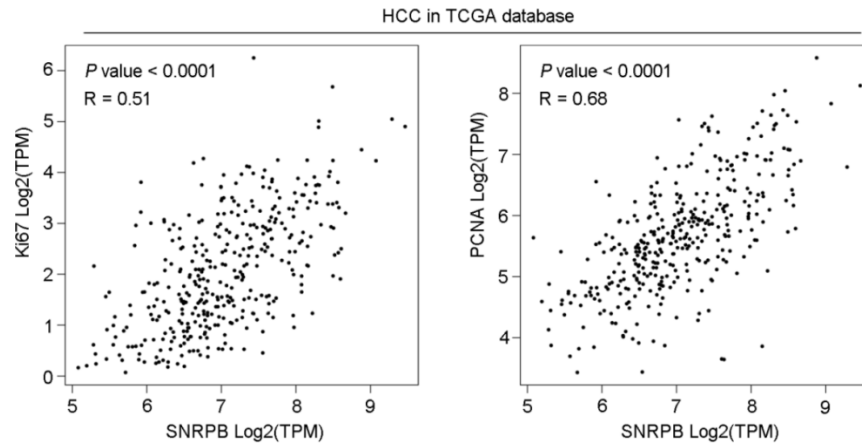

**Supplementary Figure 2.** The correlation of *SNRPB* expression and cell proliferation markers (*Ki67* and *PCNA*) in HCC based on TCGA database.

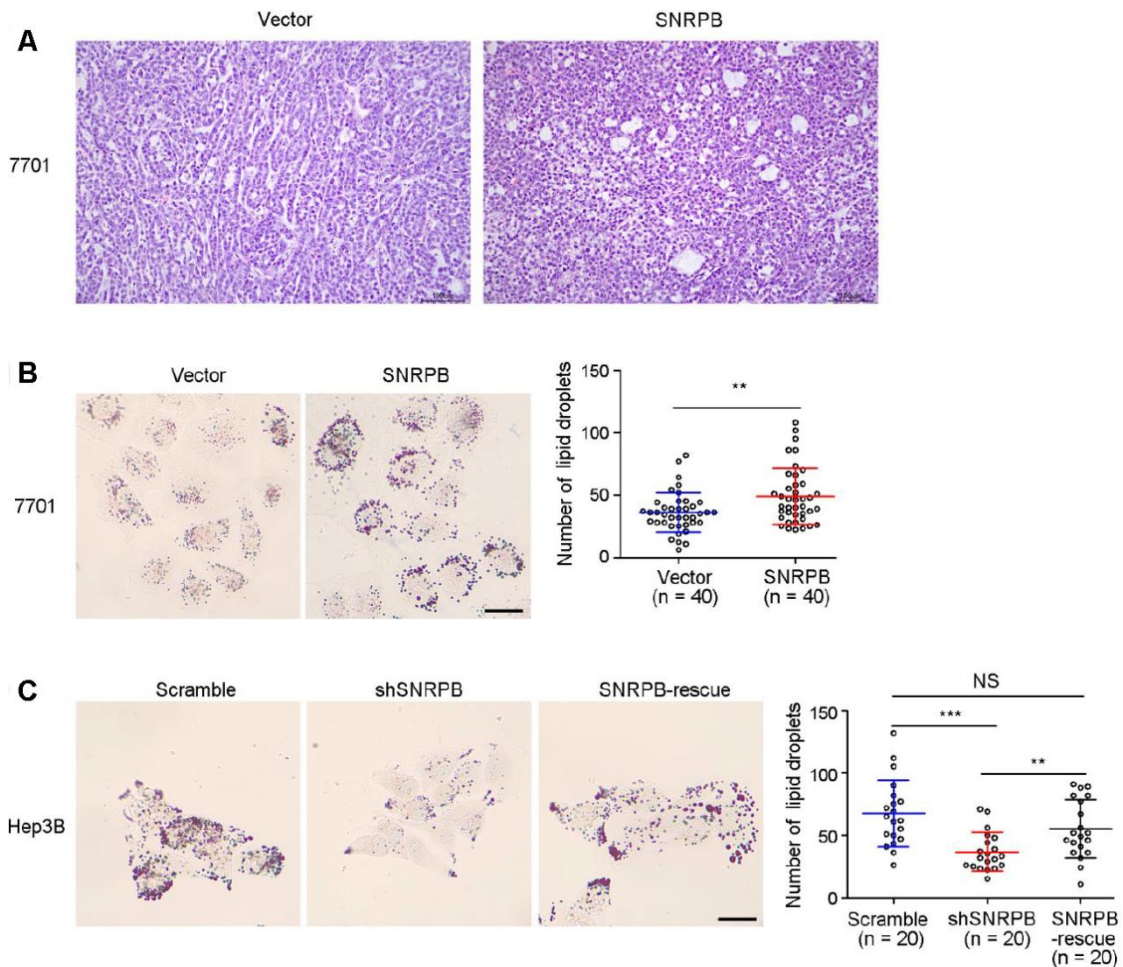

**Supplementary Figure 3.** *SNRPB* enhances the stemness of HCC cells. (A) Hematoxylin-eosin staining of xenografts from 7701 cells with or without *SNRPB* overexpression. Scale bar, 100  $\mu$ m. (B, C) Oil Red O staining of 7701 cells after *SNRPB* overexpression and Hep3B cells when *SNRPB* expression was silenced or rescued. Scale bar, 50  $\mu$ m. \*\* $P$  < 0.01, \*\*\* $P$  < 0.001, NS, no significant difference.

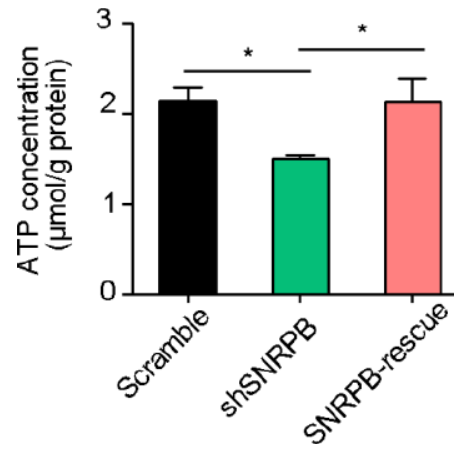

Supplementary Figure 4. The intracellular ATP concentration of Hep3B cells with *SNRPB* silence or rescue. \* $P < 0.05$ .
